# Supplementary material for: Emergence of mosaic recombinant strains potentially associated with vaccine JXA1-R and predominant circulating strains of porcine reproductive and respiratory syndrome virus in different provinces of China
Source: PubMed Central journal article supplement (PMC5379541; doi:10.1186/s12985-017-0735-3), 2017-04-04
Supplement: 12985_2017_735_MOESM4_ESM.pdf [file 12985_2017_735_MOESM4_ESM.pdf]

|                  | ORF1a     |         |           |               |           |           |           |           |           |           | ORF1b     |  |  |       | GP4 | Total |
|------------------|-----------|---------|-----------|---------------|-----------|-----------|-----------|-----------|-----------|-----------|-----------|--|--|-------|-----|-------|
|                  | 684       | 780     | 955       | 981           | 1091      | 1420      | 1658      | 418       | 842       | 1030      | 170       |  |  |       |     |       |
| VR-2332          | T I K L P | K L A N | D L S A S | E G H E A E E | G R L K F | T R S S L | Q E I A L | A E E H L | P S R T G | V N L A V | C L F A I |  |  |       |     |       |
| CH-1a            | T K Q L   |         | F         | Q A           |           |           |           |           |           |           |           |  |  |       |     |       |
| JXA1             | T Q       |         |           | Q V           |           |           |           |           |           |           |           |  |  | L P S |     |       |
| JXA1 P10         | T D Q     | T       |           | R Q V         | G         |           |           |           |           |           |           |  |  |       |     |       |
| JXA1 P15         | T D Q     | T       |           | R Q V         | G         |           |           |           |           |           |           |  |  |       |     |       |
| JXA1 P45         | T D Q     | T       |           | R Q V         | G         |           |           |           |           |           |           |  |  | V     |     |       |
| JXA1 P70         | T D Q     | T       | V         | R Q V         | G         |           |           |           |           |           |           |  |  | V     |     |       |
| JXA1 P80         | T D Q     | T       | V         | R Q V         | G         |           |           |           |           |           |           |  |  | V     |     |       |
| JXA1-P100        | T D Q     | T       | V         | R Q V         | G         |           |           |           |           |           |           |  |  | V     |     |       |
| JXA1-P110        | T D Q     | T       | V         | R Q V         | G         |           |           |           |           |           |           |  |  |       |     |       |
| JXA1-P120        | T D Q     | Q T     | V         | R Q V         | G         |           |           |           |           |           |           |  |  |       |     |       |
| JXA1-P130        | T D Q     | E T     | V         | R Q V         | G         |           |           |           |           |           |           |  |  |       |     |       |
| JXA1-P140        | T D Q     | E T     | V         | R Q V         | G         |           |           |           |           |           |           |  |  |       |     |       |
| JXA1-P150        | T D Q     | E T     | V         | R Q V         | G         |           |           |           |           |           |           |  |  |       |     |       |
| JXA1-P160        | T D Q     | E T     | V         | R Q V         | G         |           |           |           |           |           |           |  |  |       |     |       |
| JXA1-P170        | T D Q     | E T     | V         | R Q V         | G         |           |           |           |           |           |           |  |  |       |     |       |
| 11NZ-GD          | T D Q     | T       | V         | R Q V         | G         |           |           |           |           |           |           |  |  |       |     |       |
| 11SH1-GD         | T D Q     | T       | V         | R Q V         | K F E     |           |           |           |           |           |           |  |  | V     |     |       |
| 11SH-GD          | T D Q     | T       | V         | R Q V         | F E       |           |           |           |           |           |           |  |  |       |     |       |
| 11XX-GD          | T D Q     | T       | V         | R Q V         | G         |           |           |           |           |           |           |  |  | V     |     |       |
| NT1              | T D Q     | T       | V         | R Q V         | M F E     |           |           |           |           |           |           |  |  | V     |     |       |
| NT2              | T D Q     | T       | V         | R Q V         | G         |           |           |           |           |           |           |  |  |       |     |       |
| NT3              | T D Q     | T       | V         | R Q V         | S E       |           |           |           |           |           |           |  |  | V     |     |       |
| 15HEN3           | T D Q     | T       | V         | R Q D         | G         |           |           |           |           |           |           |  |  |       |     |       |
| 15HUN3           | A T D Q   | T       | V         | R Q V         | G         |           |           |           |           |           |           |  |  |       |     |       |
| 15JX2            | T D Q     | T       | V         | R Q V         | M F E     |           |           |           |           |           |           |  |  | V     |     |       |
| 15JX3            | T D Q     | T       | V         | R Q V         | G         |           |           |           |           |           |           |  |  | V     |     |       |
| 15JX4            | T D Q     | T       | V         | R Q V         | M F E     |           |           |           |           |           |           |  |  |       |     |       |
| 15LN2            | T D Q     | T       | V         | R Q V         | M F E     |           |           |           |           |           |           |  |  | F V   |     |       |
| 15SC1            | T D P     | T       | V         | R Q V         | K F E     |           |           |           |           |           |           |  |  |       |     |       |
| 15SC2            | T D Q     | T       | V         | R Q V         | M F E     |           |           |           |           |           |           |  |  | V     |     |       |
| 15ZJ2            | T D Q     | T       | V         | R Q V         | G         |           |           |           |           |           |           |  |  | V     |     |       |
| 15ZJ3            | T D Q     | T       | V         | R Q V         | G         |           |           |           |           |           |           |  |  | V     |     |       |
| GX1001           | T E Q     | T       | V         | R Q V         | G         |           |           |           |           |           |           |  |  |       |     |       |
| GX1002           | T D Q     | T       | V         | R Q V         | G         |           |           |           |           |           |           |  |  |       |     |       |
| GX1003           | T D Q     | T       | V         | R Q V         | G         |           |           |           |           |           |           |  |  |       |     |       |
| HB2014001        | T D Q     | T       | V         | S Q V         | M F E     |           |           |           |           |           |           |  |  |       |     |       |
| HEB 20130008-14  | T D Q     | T       | V         | R Q V         | G         |           |           |           |           |           |           |  |  |       |     |       |
| HEB-2013         | A T D Q   | T       | V         | R Q V         | S E       |           |           |           |           |           |           |  |  | I     |     |       |
| HENPDS-2         | T D Q     | T       | V         | R Q V         | G         |           |           |           |           |           |           |  |  | V     |     |       |
| HENZK-1          | T D Q     | I       | V         | R Q V         | M S E     |           |           |           |           |           |           |  |  | T     |     |       |
| HNxa14           | T D Q     | I       | V         | R Q V         | G         |           |           |           |           |           |           |  |  | V     |     |       |
| HNyc13           | T D H     | T       | V         | R Q V         | G         |           |           |           |           |           |           |  |  | I V   |     |       |
| HUN-2014         | T D Q     | T       | V         | R Q V         | G         |           |           |           |           |           |           |  |  |       |     |       |
| JL-04/12         | T D Q     | T       | V         | S Q V         | F E       |           |           |           |           |           |           |  |  | V     |     |       |
| NVDC-13SXJC-2014 | T D Q     | I       | V         | R Q V         | F E       |           |           |           |           |           |           |  |  | V     |     |       |
| NVDC-BJ3-2012    | T D Q     | N       | V         | R Q V         | G         |           |           |           |           |           |           |  |  |       |     |       |
| NVDC-BJ4-2012    | T D Q     | T       | V         | R Q V         | G         |           |           |           |           |           |           |  |  |       |     |       |
| NVDC-BJ5-2012    | T D Q     | T       | V         | R Q V         | G         |           |           |           |           |           |           |  |  |       |     |       |
| NVDC-BJ6-2012    | T D Q     | T       | V         | R Q V         | G         |           |           |           |           |           |           |  |  |       |     |       |
| NVDC-BJ9-2012    | T D Q     | I       | V         | R Q V         | G         |           |           |           |           |           |           |  |  | V     |     |       |
| NVDC-BJPG-2013   | I T D Q   | T       | V         | R Q V         | G         |           |           |           |           |           |           |  |  | V     |     |       |
| NVDC-HBCZ-2013   | T D Q     | T       | V         | R Q V         | F E       |           |           |           |           |           |           |  |  |       |     |       |
| NVDC-HeB1-2011   | T D Q     | T       | V         | R Q V         | G         |           |           |           |           |           |           |  |  |       |     |       |
| NVDC-HuNCS-2014  | T D Q     | T       | V         | R Q V         | G         |           |           |           |           |           |           |  |  | M     |     |       |
| NVDC-SD2-2012    | T D Q     | T       | V         | R Q V         | G         |           |           |           |           |           |           |  |  | V     |     |       |
| NVDC-SDXX-2013   | T D Q     | I       | V         | R Q V         | G         |           |           |           |           |           |           |  |  | V     |     |       |
| NVDC-shh01-2014  | T D Q     | T       | V         | R Q V         | M S E     |           |           |           |           |           |           |  |  | I     |     |       |
| NVDC-SHH02-2014  | T D Q     | T       | V         | R Q V         | M F E     |           |           |           |           |           |           |  |  | I     |     |       |
| NVDC-SXJC-2013   | T D Q     | I       | V         | R Q V         | F E       |           |           |           |           |           |           |  |  | V     |     |       |

Asp<sup>686</sup>Thr<sup>782</sup>Val<sup>958</sup>Arg<sup>981</sup>Gly<sup>987</sup>Met<sup>1092</sup>Leu<sup>1422</sup>Asp<sup>1659</sup>Gly<sup>420</sup>His<sup>844</sup>Thr<sup>1033</sup>Val<sup>172</sup>
