# Supplementary material for: Emergence of mosaic recombinant strains potentially associated with vaccine JXA1-R and predominant circulating strains of porcine reproductive and respiratory syndrome virus in different provinces of China
Source: PubMed Central journal article supplement (PMC5379541; doi:10.1186/s12985-017-0735-3), 2017-04-04

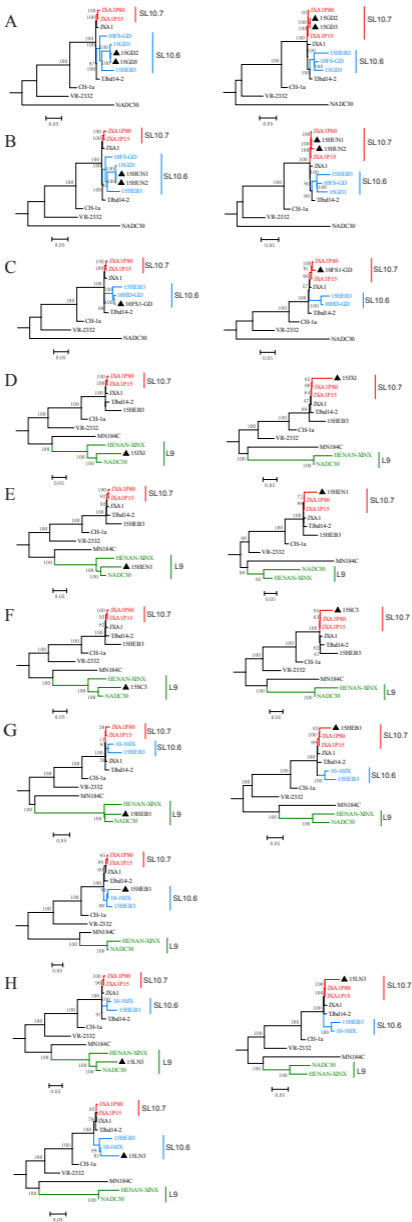

Supplement: 12985_2017_735_MOESM5_ESM.pdf [file 12985_2017_735_MOESM5_ESM.pdf]
